# Supplementary material
Source: PubMed Central journal article supplement (PMC3181486)
Supplement: emboj2011265s1.pdf [file emboj2011265s1.pdf]

**Supplementary Figure S1:** (A) Schematic representation of the Jarid2<sup>Flox/Flox</sup> locus and the strategy used to visualize the wt and the Flox/Flox mRNA by PCR from cDNA. An example of the genotyping strategy is reported. (B) As a control of homogenous recombination throughout all keratin-14 positive cells in the epidermis, mice were kept in a ROSA26-YFP background. Scale bar: 100  $\mu$ m. (C) RT-PCR showing deletion of Jarid2 in keratinocytes isolated from Jarid2cKO mice compared to control keratinocytes. Amplification of Keratin-14 was used as a control. Quantitative RT-qPCR with the same primers shows that the level of Jarid2 is undetectable in the conditional KO mice. Expression of HPRT-I was used for normalizing the data. Data are presented as mean + S.E.M. (D) Western-Blot showing the expression of Jarid2 in keratinocytes isolated from Jarid2wt and Jarid2cKO newborn mice. Total H3 was used for normalization.

**Supplementary Figure S2:** The expression of Jarid2 (mRNA) is the same in basal ( $\alpha$ 6<sup>bright</sup>) and suprabasal ( $\alpha$ 6<sup>dim</sup>) keratinocytes isolated from the epidermis of E16.5 and E18.5 embryos. CD31, CD140a and CD45 antibodies (Lin-) were used to exclude the non epidermal lineages from the preparation. One representative FACS-sorting is presented. Data are presented as mean + S.T.D.V. of the RT-qPCR. N=9 mice for E18.5, N=6 for E16.5 embryos.

**Supplementary Figure S3:** Jarid2 mRNA levels were downregulated during differentiation in primary human keratinocytes ( $P^* < 0.05$ ,  $P^{**} < 0.01$ ). Primary human keratinocytes, isolated from foreskin, were sorted based on their surface levels of  $\alpha$ 6-integrin, and Jarid2 levels were assessed by RT-qPCR. Involucrin and  $\alpha$ 6-integrin levels were used as a control. Primers for HPRT-I were used for

normalization. The sorting strategy used for this experiment is reported on the left. N=4. Data are presented as average + S.E.M. P value<0,05.

**Supplementary Figure S4. Jarid2 is required for the ectopic activation of bulge stem cells and their progeny upon TPA treatment:** (A) The response to

TPA treatment was delayed in Jarid2cKO. The epidermis of TPA-treated Jarid2cKO animals displayed a thicker cornified layer than control littermates (left panel; scale bar: 100  $\mu$ m). The middle panel shows an increased expression of the loricrin (red fluorescence) in TPA-treated Jarid2cKO mice compared to controls. Keratin-14 is marked as green fluorescence. Scale bar: 25  $\mu$ m.

Wholemount staining for Ki67 in TPA-treated tails reveals a reduction in the number of proliferative cells in the bulge and bulb. Scale bars: 100  $\mu$ m and 25  $\mu$ m, respectively. N=7.

**Supplementary Figure S5:** (A) Expression of Jarid2 (mRNA) is lower in differentiated keratinocytes than in basal progenitors isolated from the epidermis of P8 mice. Cells were FACS-sorted on the basis of bright and dim expression of the surface markers  $\alpha$ 6-integrin. Non-epidermal contaminants were excluded using Lineage- antibodies (CD31, CD45, CD140a). (B) The epidermis of Jarid2cKO P8 mice show increased expression of differentiation genes and p16. Data are presented as average + S.T.D.V. N=6 Jarid2 wt, 4 Jarid2 cKO.

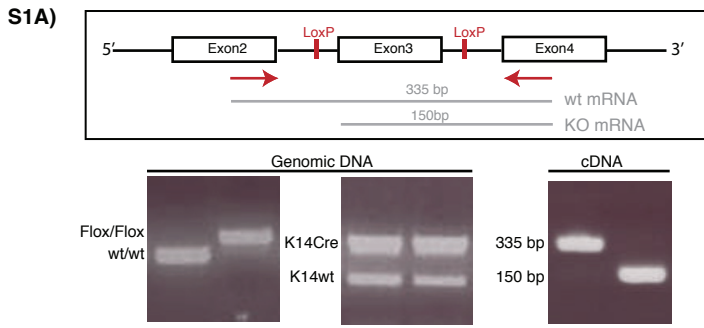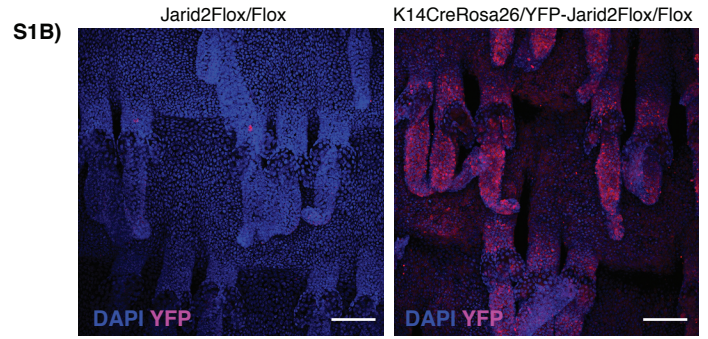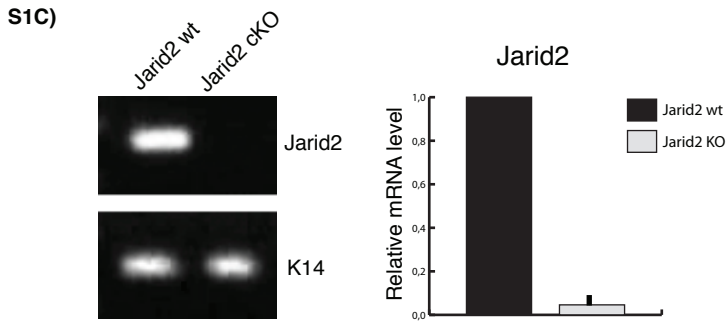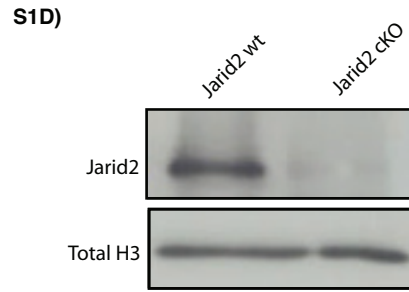

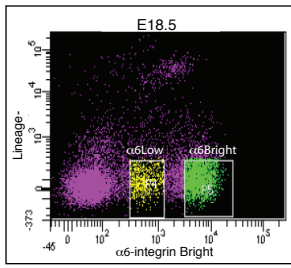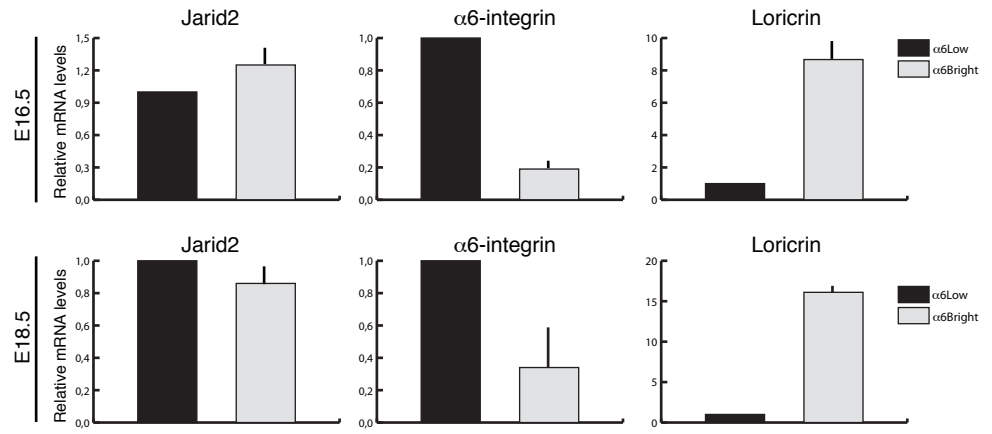

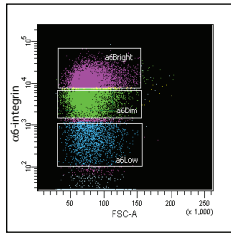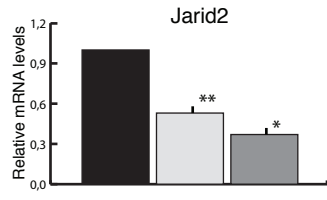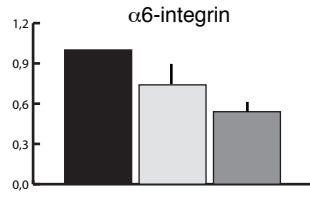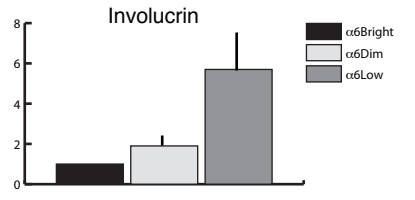

S4A)

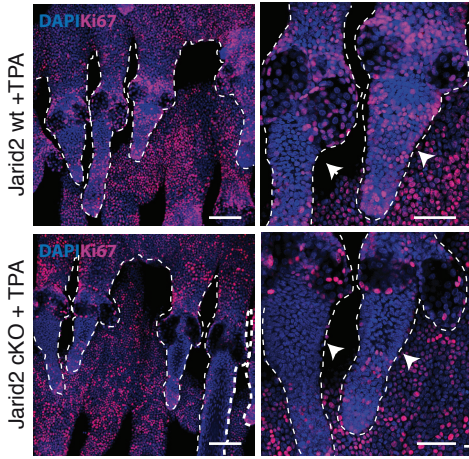

S4B)

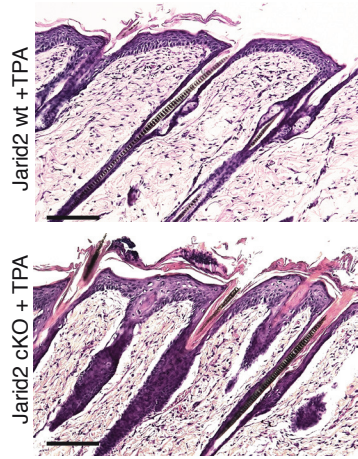

S4C)

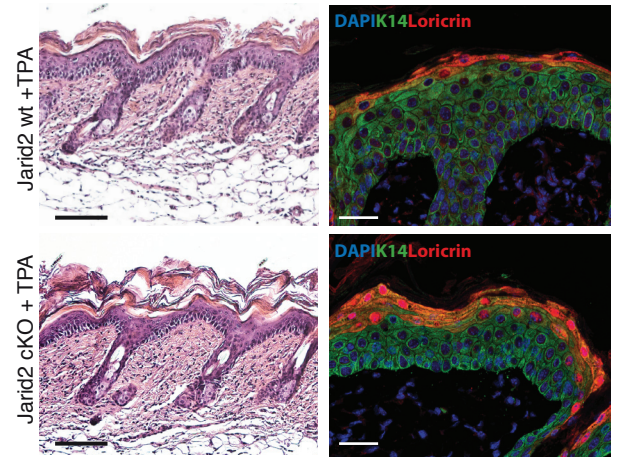

S5A)

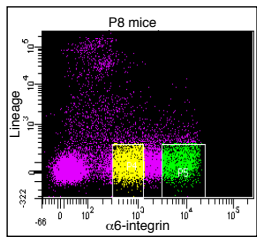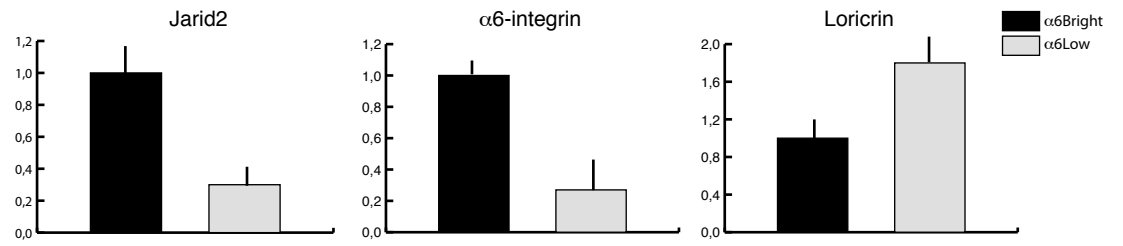

S5B)

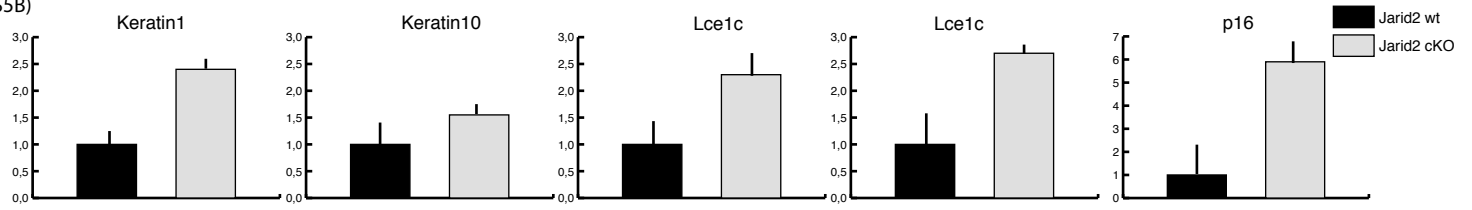

| <b>Table1</b>         |                          |                      |
|-----------------------|--------------------------|----------------------|
| <u>Genotyping PCR</u> | <u>Fw Primer</u>         | <u>Rev Primer</u>    |
| Jarid2 Flox           | GCGGTAAATGGTGAGTTGAAA    | ACAGACTGACACACCTTCC  |
| K14 wt                | CAAATGTTGCTTGCTTGTCTGGTG | GTCAGTCGAGTGCACAGTTT |
| Cre Tg                | GTCCATGTCCTTCTGAAGC      | TTCTCAGGAGTGTCTTTCGC |

| <b>Table2</b>     |                               |                              |
|-------------------|-------------------------------|------------------------------|
| <u>Mouse qPCR</u> | <u>Fw Primer</u>              | <u>Rev Primer</u>            |
| K14               | AGCGGCAAGAGTGAGATTTCT         | CCTCCAGGTTATTCTCCAGGG        |
| K1                | GACACCACAACCCGGACCCAAAACCTTAG | ATACTGGGCCTTGACTTCCGAGATGATG |
| K10               | GGAGGGTAAAATCAAGGAGTGGTA      | TCAATCTGCAGCAGCACGTT         |
| Loricrin          | TCACTCATCTTCCCTGGTGCTT        | GTCTTTCCACAACCCACAGGA        |
| Involucrin        | GTCCGGTTCTCCAATTCGTGTTT       | GCAATTGGAAGAGAAGCAGCATCAG    |
| Lce1a2            | GAGGTGCCCAAGGATCTTGAC         | CCAGGCTACAGCAGGAAGACAC       |
| Lce1c             | AGATCTCAAACATTCTATGCAGAGGAA   | TCACAAAATACTGAAGAAGAAAGGGATT |
| Lce1d             | GACTGCTGCTGATCTCAATGAGAA      | TGCAGAAACTTCCCTGAAGATTTT     |
| Lce1l             | CATGAAGGCTTCAGACAAGCAAT       | TTGGAATCACAGAAGGAGATGAGAC    |
| Lce1m             | AGCATTGACTGAAGACCTGCAA        | GCAAAGCCAATGCATCTCAGA        |
| Crt1              | ACTGCACTTTGATGTTTCAAGAACTTC   | CAGGAGGCCTGTTTTGAACACT       |
| Filaggrin         | GGAGGCATGGTGGAACTGA           | TGTTTATCTTTTCCCTCACTTCTACATC |
| a6-integrin       | TGCAGAGGGCGAACAGAAC           | GCACACGTCACCACTTTGC          |
| CD34              | AAGGCTGGGTGAAGACCCTTA         | TGAATGGCCGTTTCTGGAAGT        |
| Ki67              | AGGAGGAACCAACCAAGGACAGTT      | TTTCTCTGTGCTGTGGGCTCTTCT     |
| Jarid2            | GGTGCAGGTACAAACAGTGCCAAA      | GTGGTGGTTGGGTTTGGTTTCCCT     |
| Jmj 150-387       | AGGCCTTGCCGGGAGCCTGAA         | AGCAAAGGCTCCACTATCTTC        |
| Pum1              | AGGCGTTAGCATGGTGGAGTA         | TCCATCAAACGTACCCTTGTTT       |
| HPRT-I            | TCAGTCAACGGGGGACATAAA         | GGGGCTGTACTGCTTAACCAG        |
|                   |                               |                              |
| <u>Human qPCR</u> | <u>Fw Primer</u>              | <u>Rev Primer</u>            |
| a6-integrin       | CTAGTGGCTATTCTCGCTGGG         | CGTTCCACTTTGTGATCCACTG       |
| Involucrin        | GACTGCTGTAAAGGGACTGCC         | CATTCCAGTTGCTCATCTCTC        |
| Filaggrin         | GAGAGGCGATCTGAGTCTGC          | CTGCCACGTGACTGTATTCC         |
| Jarid2            | GGTCAGAAGAACGGGTGGTA          | TTACCAAGGAGCCCATTCAC         |
| Pum1              | CGGTCGTCCTGAGGATAAAA          | CGTACGTGAGGCGTGAGTAA         |
| HPRT-I            | TGGACAGGACTGAACGTCTTG         | CCAGCAGGTCAGCAAAGAATT        |

| <b>Table3</b>    |                              |                            |
|------------------|------------------------------|----------------------------|
| <u>ChIP qPCR</u> | <u>Fw Primer</u>             | <u>Rev Primer</u>          |
| Olig2            | TGCTTATTACAGACCGAGCCAAC      | CTAAATCCTAGCCACTTTGGAGAAGT |
| Neurg1           | CCGGGTCGTACGGACAGTAA         | TCCGTGAGGAAGCTGCACA        |
| Neurog2          | CAGATCTGATTGTTTTCTTGGTGGTATA | GCGTGGTTGTCTGTGTCAGTCAGT   |
| HoxB13           | TCTGGAAAGCAGCGTTTGC          | CTTAGTGATAAACTTGTGGCTGCA   |
| Actin-B          | CCGTAAAGACCTCTATGCCAACAC     | GCTAGGAGCCAGAGCAGTAATCTC   |
| p16 Promoter     | GATGGAGCCCGGACTACAGAA        | CTGTTTCAACGCCAGCTCTC       |
| K14              | AGGAGGGATCTGATCGGGAGT        | AGAGCTGCTCAGGTGTGTTAGAAAA  |
| K1               | CTCAGTATATAAGGGCACGGCACT     | GACTCATGATGCCTTAGAGAGAGGT  |



|           |                             |                             |
|-----------|-----------------------------|-----------------------------|
| K10       | AGCAAAGCCTAGCACCTGTGA       | GCTGCTGGAGCTGTATAGAACAGAC   |
| Loricrin  | CAGAGCAGGACAAGAGTATAAAACACA | GCCCACACTTACCTGAAGCAC       |
| Lce1a2    | GAGGTGCCCAAGGATCTTGTAC      | CCTTCCCCAACACTTCCAT         |
| Lce1i     | TCCTGGAGGTAAGGGCAGAGA       | CAAGGCTGTGGCTAGTTATTGTCA    |
| Lce1m     | AGCATTGACTGAAGACCTGCAA      | GCAAAGCCAATGCATCTCAGA       |
| Lce3b     | AAAGCATCCTCAGACACGGACTT     | CCTATTGCACTTATGTCTGGATTCTGT |
| Crct1     | TCTGCCTAGCAGGTGTCAAGTTC     | GCTACATTCTGGCTGCATCCTACT    |
| Filaggrin | TCCCTTTTACAGGTGCATACACAC    | CCTCCTTATCACTGGTTGAGTATTGTT |
| Spr2f     | TCTTTGAAAGGCCATATACCTCAGC   | GTTCTGGTGCCCTGAGAAACC       |
| Spr2h     | TGGTTCCAAACTCTGAGCAAGTGTA   | CCTGTATATCAAGAGAGGGCATCAGAT |
